# Supplementary material
Source: publisher figshare collection journal article supplement (https://sage.figshare.com/ndownloader/files/13836809)
Supplement: Supplementary file 1 [file 13836809]

Table 1. The time interval from presentation to the ED to the onset of first hyperthermia in the hyperthermia group according to neurological outcomes.

| The onset of hyperthermia within first 24 hours | Good neurologic outcome (n=29) | Poor neurologic outcome (n=26) | P value |
|-------------------------------------------------|--------------------------------|--------------------------------|---------|
| Early onset                                     | 16 (55.2%)                     | 19 (73.1%)                     | 0.224   |
| Middle onset                                    | 11 (37.9%)                     | 7 (26.9%)                      |         |
| Late onset                                      | 2 (6.9%)                       | 0 (0%)                         |         |

No difference was observed in the time onset of hyperthermia among the three time categories (early onset; time interval from presentation to onset of hyperthermia  $\leq 8$  hours; middle onset: 8 hours < time interval from presentation to onset of hyperthermia  $\leq 16$  hours; and late onset: 16 hours < time interval from presentation to onset of hyperthermia  $\leq 24$  hours).

Figure 1. The time interval from presentation to the ED to the onset of first hyperthermia in the hyperthermia group according to the neurological outcomes.

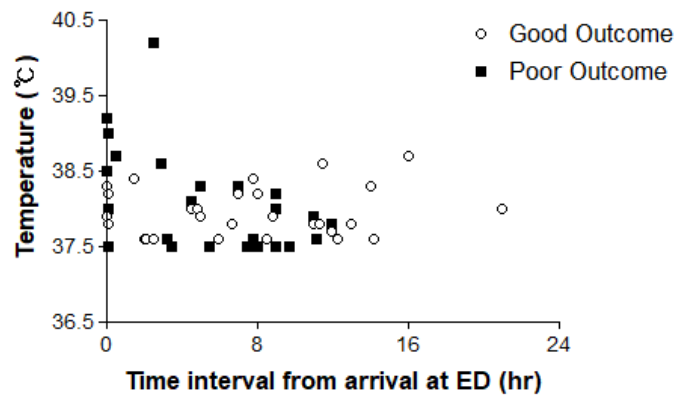

No difference was observed in the time interval from arrival at the ED to the onset of hyperthermia in patients stratified according to long-term neurological outcomes (7.8 hours (2.3-11.8 hours) in patients with good long-term neurological outcomes vs. 4.8 hours (0.1-9.0 hours) in patients with poor long-term neurological outcomes,  $p=0.088$ ).
